# Supplementary material
Source: Elsevier journal article supplement (https://www.sciencedirect.com/science/article/pii/S0122726220300379)
Supplement: mmc1 [file S0122726220300379:mmc1.xlsx]

## Sheet: Tabla S1
Tabla S1.	Tablas de contingencia para vivos y muertos como referente estándar y porcentaje de disminución de lactato como prueba índice
	0.1			0.2			0.3			0.4			0.5
0-6 Horas
	V	M		V	M		V	M		V	M		V	M
SI	11	9		8	8		5	5		5	1		2	0
NO	9	4		12	5		15	8		15	12		18	13
	55	69.2308		40	61.5385		25	38.4615		25	7.69231		10	0
0-12 Horas
	V	M		V	M		V	M		V	M		V	M
SI	16	9		13	7		10	3		8	1		6	0
NO	4	4		7	6		10	10		12	12		14	13
	80	69.2308		65	53.8462		50	23.0769		40	7.69231		30	0
0-24 Horas
	V	M		V	M		V	M		V	M		V	M
SI	17	8		17	6		15	4		10	3		9	1
NO	3	5		3	7		5	9		10	10		11	12
	85	61.5385		85	46.1538		75	30.7692		50	23.0769		45	7.69231
